# Supplementary material
Source: Springer Nature journal article supplement (https://www.springermedizin.de/resource/supplementary/12958_2008_486_MOESM6_ESM.pdf/9568092)

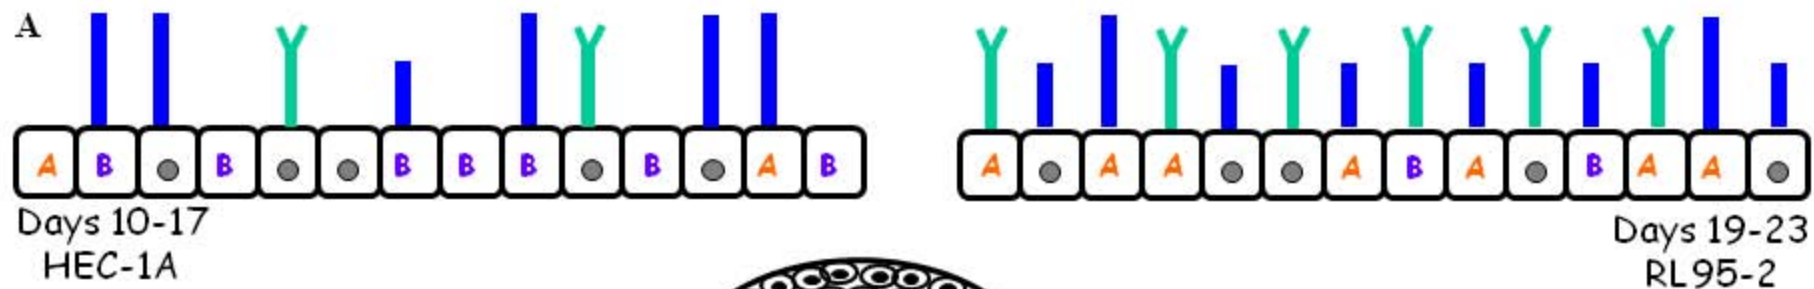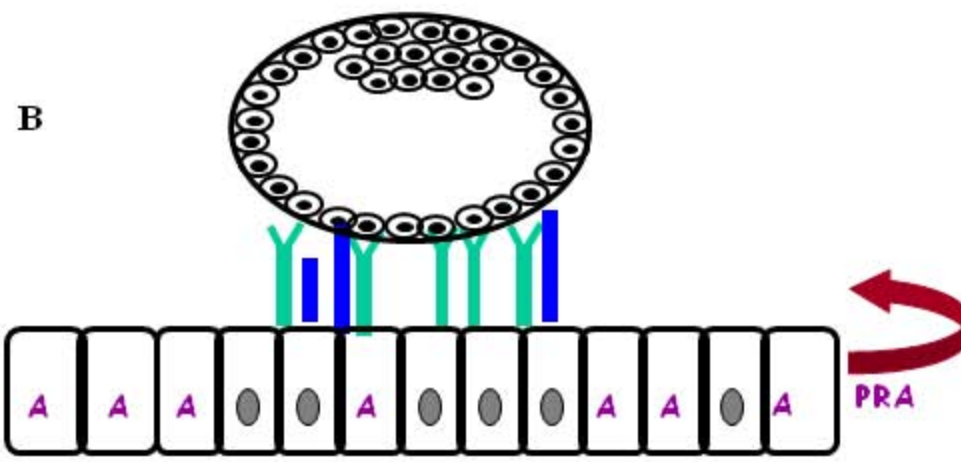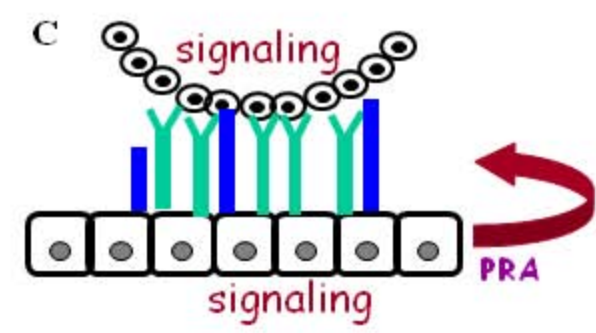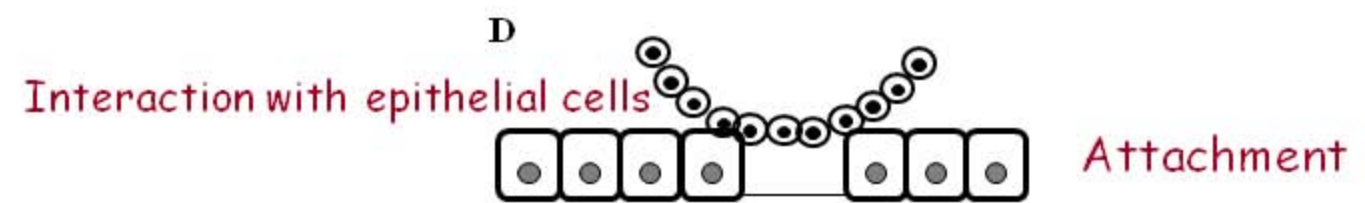

▲ - PRA  
▲ - PRB  
▬ - 140 kDa c- Met  
▬ - 50 kDa c- Met  
Y - PB1

Supplement: MOESM6 [file 9568092]
